# Supplementary material
Source: ML conference proceedings conference paper supplement (https://openreview.net/forum?id=gud0qopqJc4)
Supplement: supplementary_material [file attachment]

## 1 A Experimental Details

2 All experiments were done on a single NVIDIA Titan Xp GPU. All of our code can be found attached  
3 in the supplementary material.

### 4 A.1 Learning the Concept Bank

5 Before learning the concept bank, we ran an analysis to see how many samples from a concept we  
6 would need to get a reasonable performance. To test this, we follow [2, 1]. Concretely, for a given  
7 concept indexed by  $i$ , we collect two sets of embeddings  $P_i = \{f(x_{p_1}), \dots, f(x_{p_{N_p}})\}$ , that contains  
8 the concept, and similarly negative examples  $N_i = \{f(x_{n_1}), \dots, f(x_{n_{N_n}})\}$  that do not contain the  
9 concept. We then train a linear SVM using  $P_i$  and  $N_i$  to learn the corresponding CAV. Since the  
10 sample sizes are limited for many concepts, we run leave-10-out cross-validation to test these linear  
11 SVMs, i.e. we have a held-out set of 10 images, and we run this test 25 times.

12 On Figure 1, on x-axis we give the minimum number of training samples used for a concept, i.e.  
13 for an x-axis value of 10 we used all concepts where there are  $> 40 + 5$  images such that we can  
14 choose 40 positive training and 5 positive validation images, and similarly we sample  $40 + 5$  negative  
15 images. On the y-axis, we report the accuracy on the held out 10 images, averaged over different  
16 concepts and 25 runs. We observe that performance saturates around 50 samples, hence we use 50  
17 as a threshold to filter concepts in the later sections. We also report accuracy for different concept  
18 categories, grouped under Primary Descriptors, Secondary Descriptors, Shape, and Color features.

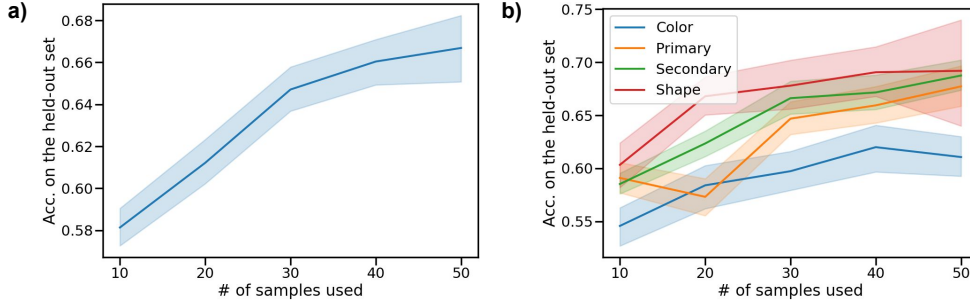

Figure 1: Ablation on the number of images per a concept.

### 19 A.2 Generating Counterfactual Explanations

20 We use L2 regularization strength 0.0001, L1 regularization strength 0.0001, used mean margin  
21 statistics for validity constraints, and implemented the optimization procedure in PyTorch. We ran  
22 CCE individually over a batch of mistakes, and report examples in the main paper. For algorithmic  
23 details, we refer the reader to [1].

### 24 A.3 PCBM

25 We use the Inception backbone from the PyTorch implementation. We then use scikit-learn library  
26 to fit the linear model (SGDClassifier). We use the hyperparameters reported in the PCBM paper  
27 without any adjustments. Particularly, we use the regularization strength 0.01, sparsity ratio 0.9, and  
28 for the learning rate we use scikit-learn’s ‘optimal’ learning rate setting for the SGDClassifier. We  
29 trained the model on a subset of Fitzpatrick17k that was not used to label concepts. Then, we tested  
30 the model on the held-out DDI dataset. We ran our experiments with 5 seeds, and report the error  
31 bars in the main paper.

| Concept                    | DDI # Images | % of images | Fitz17k # Images | % of Images |
|----------------------------|--------------|-------------|------------------|-------------|
| Vesicle                    | 0            | 0.00        | 46               | 0.01        |
| Papule                     | 410          | 0.62        | 1,170            | 0.32        |
| Macule                     | 24           | 0.04        | 13               | 0.00        |
| Plaque                     | 168          | 0.26        | 1,967            | 0.53        |
| Abscess                    | 0            | 0.00        | 5                | 0.00        |
| Pustule                    | 0            | 0.00        | 103              | 0.03        |
| Bulla                      | 0            | 0.00        | 64               | 0.02        |
| Patch                      | 6            | 0.01        | 149              | 0.04        |
| Nodule                     | 46           | 0.07        | 189              | 0.05        |
| Ulcer                      | 13           | 0.02        | 154              | 0.04        |
| Crust                      | 53           | 0.08        | 497              | 0.13        |
| Erosion                    | 14           | 0.02        | 200              | 0.05        |
| Excoriation                | 0            | 0.00        | 46               | 0.01        |
| Atrophy                    | 1            | 0.00        | 69               | 0.02        |
| Exudate                    | 13           | 0.02        | 144              | 0.04        |
| Purpura/Petechiae          | 0            | 0.00        | 10               | 0.00        |
| Fissure                    | 0            | 0.00        | 32               | 0.01        |
| Induration                 | 0            | 0.00        | 33               | 0.01        |
| Xerosis                    | 0            | 0.00        | 35               | 0.01        |
| Telangiectasia             | 5            | 0.01        | 100              | 0.03        |
| Scale                      | 103          | 0.16        | 686              | 0.19        |
| Scar                       | 4            | 0.01        | 123              | 0.03        |
| Friable                    | 14           | 0.02        | 153              | 0.04        |
| Sclerosis                  | 0            | 0.00        | 27               | 0.01        |
| Pedunculated               | 8            | 0.01        | 26               | 0.01        |
| Exophytic/Fungating        | 8            | 0.01        | 42               | 0.01        |
| Warty/Papillomatous        | 18           | 0.03        | 46               | 0.01        |
| Dome-shaped                | 67           | 0.10        | 146              | 0.04        |
| Flat topped                | 0            | 0.00        | 18               | 0.00        |
| Brown(Hyperpigmentation)   | 363          | 0.55        | 760              | 0.21        |
| Translucent                | 7            | 0.01        | 16               | 0.00        |
| White(Hypopigmentation)    | 22           | 0.03        | 257              | 0.07        |
| Purple                     | 2            | 0.00        | 85               | 0.02        |
| Yellow                     | 23           | 0.04        | 245              | 0.07        |
| Black                      | 29           | 0.04        | 90               | 0.02        |
| Erythema                   | 235          | 0.36        | 2,139            | 0.58        |
| Comedo                     | 3            | 0.00        | 24               | 0.01        |
| Lichenification            | 1            | 0.00        | 25               | 0.01        |
| Blue                       | 0            | 0.00        | 5                | 0.00        |
| Umbilicated                | 5            | 0.01        | 49               | 0.01        |
| Poikiloderma               | 0            | 0.00        | 5                | 0.00        |
| Salmon                     | 3            | 0.00        | 10               | 0.00        |
| Wheal                      | 0            | 0.00        | 21               | 0.01        |
| Acuminate                  | 0            | 0.00        | 8                | 0.00        |
| Burrow                     | 0            | 0.00        | 5                | 0.00        |
| Gray                       | 0            | 0.00        | 5                | 0.00        |
| Pigmented                  | 1            | 0.00        | 5                | 0.00        |
| Cyst                       | 0            | 0.00        | 6                | 0.00        |
| Do not consider this image | 20           | 0.03        | 460              | 0.12        |

Table 1: Concept Statistics for the Dataset. In total, we have  $3230 + 656 = 3886$  images.

## 32 **B Dataset Statistics**

### 33 **References**

- 34 [1] Abubakar Abid, Mert Yuksekgonul, and James Zou. Meaningfully debugging model mistakes us-  
35 ing conceptual counterfactual explanations. In *Proceedings of the 39th International Conference*  
36 *on Machine Learning*. PMLR, 2022.
- 37 [2] Been Kim, Martin Wattenberg, Justin Gilmer, Carrie Cai, James Wexler, Fernanda Viegas, et al.  
38 Interpretability beyond feature attribution: Quantitative testing with concept activation vectors  
39 (tcav). In *International conference on machine learning*, pages 2668–2677. PMLR, 2018.
